# Supplementary material
Source: publisher figshare collection journal article supplement (https://tandf.figshare.com/ndownloader/files/18771185)
Supplement: Supplementary file [file 18771185]

## Supplementary data

Appendix 1. Categorization of ICD-10 and NOMESCO codes representing medical and hip complications

| Category of complication            | ICD-10 and NOMESCO codes                                                                                                                                                                                                                                                                           |
|-------------------------------------|----------------------------------------------------------------------------------------------------------------------------------------------------------------------------------------------------------------------------------------------------------------------------------------------------|
| <b>Medical complications</b>        |                                                                                                                                                                                                                                                                                                    |
| Cardiovascular                      | I11.x–I13.x, I20.x–I24.x, I25.3, I25.4, I25.6, I30.x–I33.x, I38.9, I39.8, I40.x–I41.x, I44.x–I50.x, I51.1–I51.4, I51.6–I51.9, I52.x, I70.2–I70.9, I71.0, I71.1, I71.3, I71.5, I71.8, I72.x, I73.9x, I77.0–I77.2, I77.6–I77.9, I79.x, I97.8, I97.9, I98.1, I98.8, I99.9, J81.9, T81.0, T81.1, T81.7 |
| Pneumonia                           | J12.x–J22.x                                                                                                                                                                                                                                                                                        |
| Urinary tract infection             | N30.0, N30.9, N39.0                                                                                                                                                                                                                                                                                |
| Cerebrovascular                     | I60.x–I66.x, I67.6, I67.8, I67.9, I68.1–I68.8, I81.9, I82.0–I82.3                                                                                                                                                                                                                                  |
| Thromboembolic                      | I26.x, I28.x, I80.x, I82.8, I82.9, I87.0                                                                                                                                                                                                                                                           |
| Urinary retention                   | R33.9                                                                                                                                                                                                                                                                                              |
| Renal failure                       | I12.0, I13.x, N17.x, N99.0                                                                                                                                                                                                                                                                         |
| Stomach ulcer                       | K25.x, K26.x, K27.x, K29.8, K29.9                                                                                                                                                                                                                                                                  |
| Pressure ulcer                      | L89.x                                                                                                                                                                                                                                                                                              |
| <b>Hip complications</b>            |                                                                                                                                                                                                                                                                                                    |
| Fracture surgery femur              | M966F, NFJx                                                                                                                                                                                                                                                                                        |
| Infection                           | M00.0, M00.0F, M00.1, M00.2, M00.2F, M00.8, M00.8F, M00.9, M00.9F, M86.0F, M86.1F, M86.6, M86.6F, NFSx, T81.4, T84.5, T84.5F, T84.5X, T84.7, TNF05, TNF10                                                                                                                                          |
| Dislocation                         | M24.3–4, M24.4F, NFH0–NFH30, NFH4x, NFH7–9, S73.0, T93.3                                                                                                                                                                                                                                           |
| Any reoperation                     | NFA00–22, NFA31–32, NFCx, NFF01–12, NFF22, NFF32, NFF92, NFL09–19, NFL39–49, NFL69–99, NFM09–29, NFM49, NFM79–99, NFTx, NFWx                                                                                                                                                                       |
| Girdlestone, arthrodesis            | NFG09–49, NFG99, NFGQ9                                                                                                                                                                                                                                                                             |
| Extraction of prosthesis or implant | NFUx                                                                                                                                                                                                                                                                                               |
| Other hip complication              | M24.5–6, M25.6, T84.0, T84.0F, T84.0X, T84.3, T84.4, T84.8, T88.8                                                                                                                                                                                                                                  |
| Problems with wound healing         | QDBx, QDE35, QDG30, T81.3                                                                                                                                                                                                                                                                          |
| Other surgical complication         | G57.0, G57.2–4, G57.8–9, G97.8–9, M96.8–9, S34.2, S74.x, T81.2, T81.5–6, T81.8, T81.8W, T81.9, T88.9                                                                                                                                                                                               |

Table 5. Logistic regression model of medical complications

| Factor                     | Odds ratio (95% CI) |
|----------------------------|---------------------|
| Hemiarthroplasty           | 1                   |
| THA                        | 0.83 (0.76–0.91)    |
| Age deviation              | 1.04 (1.03–1.04)    |
| Men                        | 1                   |
| Women                      | 0.66 (0.60–0.73)    |
| Income (log <sub>2</sub> ) | 0.98 (0.91–1.04)    |
| Primary school             | 1                   |
| High school                | 1.09 (0.99–1.20)    |
| University                 | 1.14 (1.00–1.30)    |
| Married                    | 1                   |
| Unmarried                  | 1.24 (1.07–1.44)    |
| Divorced                   | 1.11 (0.98–1.26)    |
| Widowed                    | 1.09 (0.97–1.22)    |
| Elixhauser 0               | 1                   |
| Elixhauser 1               | 1.59 (1.42–1.77)    |
| Elixhauser 2               | 2.44 (2.16–2.76)    |
| Elixhauser 3+              | 4.15 (3.65–4.72)    |
| Year of surgery            | 0.99 (0.97–1.02)    |

Table 6. Logistic regression model of hip complications

| Factor                     | Odds ratio (95% CI) |
|----------------------------|---------------------|
| Hemiarthroplasty           | 1                   |
| THA                        | 1.31 (1.20–1.43)    |
| Age deviation              | 1.00 (0.99–1.00)    |
| Men                        | 1                   |
| Women                      | 0.84 (0.76–0.93)    |
| Income (log <sub>2</sub> ) | 1.03 (0.96–1.10)    |
| Primary school             | 1                   |
| High school                | 1.05 (0.95–1.16)    |
| University                 | 1.06 (0.93–1.21)    |
| Married                    | 1                   |
| Unmarried                  | 1.10 (0.95–1.28)    |
| Divorced                   | 1.17 (1.03–1.32)    |
| Widowed                    | 1.09 (0.98–1.22)    |
| Elixhauser 0               | 1                   |
| Elixhauser 1               | 1.10 (0.99–1.23)    |
| Elixhauser 2               | 1.30 (1.15–1.47)    |
| Elixhauser 3+              | 1.51 (1.32–1.73)    |
| Year of surgery            | 0.90 (0.88–0.91)    |

Table 7. Logistic regression model of 1-year mortality

| Factor                     | Odds ratio (95% CI) |
|----------------------------|---------------------|
| Hemiarthroplasty           | 1                   |
| THA                        | 0.42 (0.38–0.48)    |
| Age deviation              | 1.04 (1.03–1.05)    |
| Men                        | 1                   |
| Women                      | 0.56 (0.50–0.64)    |
| Income (log <sub>2</sub> ) | 1.03 (0.94–1.12)    |
| Primary school             | 1                   |
| High school                | 1.02 (0.90–1.16)    |
| University                 | 0.83 (0.69–0.99)    |
| Married                    | 1                   |
| Unmarried                  | 1.07 (0.88–1.30)    |
| Divorced                   | 1.20 (1.02–1.41)    |
| Widowed                    | 1.03 (0.89–1.18)    |
| Elixhauser 0               | 1                   |
| Elixhauser 1               | 1.27 (1.09–1.48)    |
| Elixhauser 2               | 2.13 (1.82–2.49)    |
| Elixhauser 3+              | 3.85 (3.28–4.51)    |
| Year of surgery            | 0.99 (0.96–1.02)    |
